# Supplementary material for: Ultra-high ICE and long cycle stability sodium-ion battery anode: hybrid nanostructure of dominant pyridine N-doped sisal fiber derived carbon-MoS2
Source: Royal Society of Chemistry journal article supplement (doi:10.1039/d4ta09287b), 2025-01-01
Supplement: d4ta09287b1.pdf [file d4ta09287b1.pdf]

## Electronic Supporting Information (ESI)

### **Ultra-high ICE and long cycle stability sodium-ion battery anode: Hybrid nanostructure of dominant pyridine N-doped sisal fiber derived carbon- MoS<sub>2</sub>**

Yuan Luo<sup>1</sup>, Yujie Wang<sup>1</sup>, Xuenuan Li<sup>1</sup>, Shilong Lin<sup>1</sup>, Yingxi Qin<sup>1</sup>, Lei Liao<sup>2</sup>, Kaiyou  
Zhang<sup>1</sup>, Aimiao Qin<sup>1\*</sup>

<sup>1</sup>Key Laboratory of New Processing Technology for Nonferrous Metal & Materials,  
Ministry of Education/Guangxi Key Laboratory of Optical and Electronic Materials  
and Devices, College of Material Science and Engineering, Guilin University of  
Technology, Guilin 541004, China.

<sup>2</sup>College of Environmental Science and Engineering, Guilin University of Technology,  
Guilin 541004, China

\*Corresponding author.

E-mail address: 2005032@glut.edu.cn (A.M. Qin)

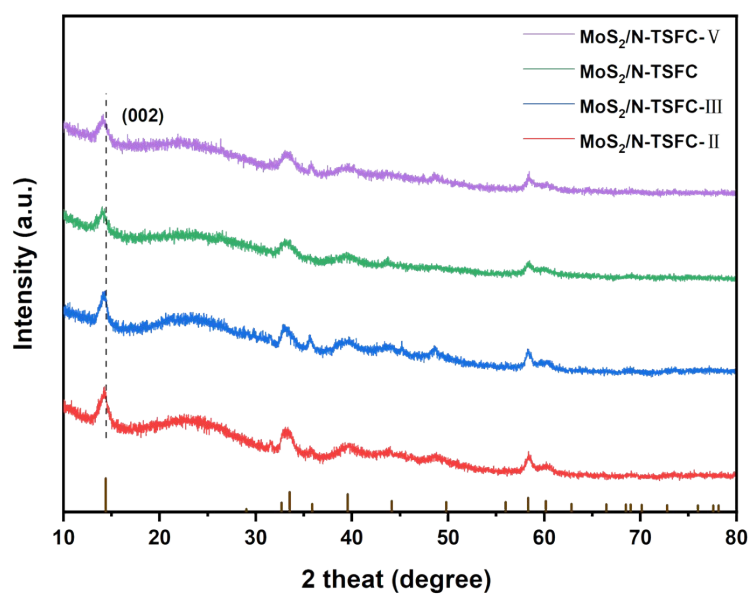

Fig.S1 XRD patterns of MoS<sub>2</sub>/N-TSFC composites prepared at different conditions, and MoS<sub>2</sub> standard samples.

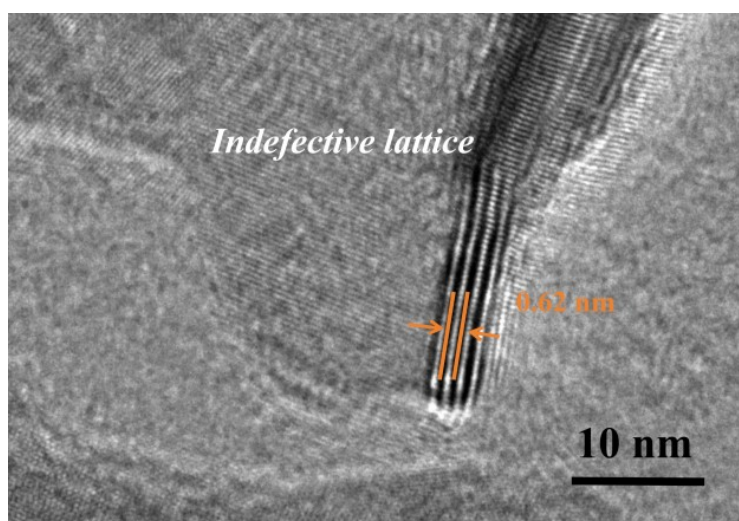

Fig. S2 The HRTEM image of MoS<sub>2</sub>/TSFC.

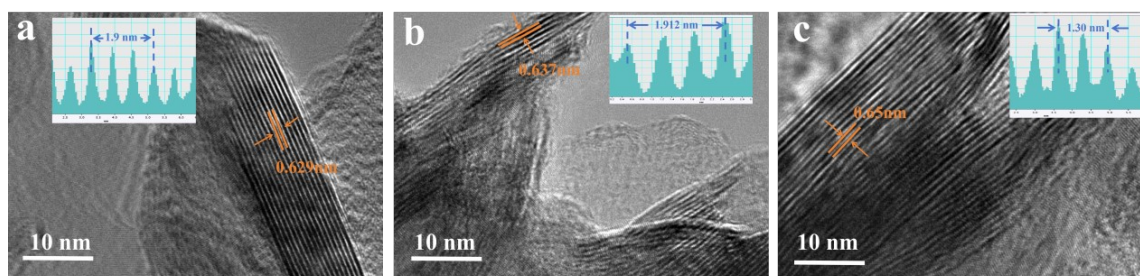

Fig. S3 The HRTEM images of (a) MoS<sub>2</sub>/N-TSFC-II, (b) MoS<sub>2</sub>/N-TSFC-III and (c) MoS<sub>2</sub>/N-TSFC-V.

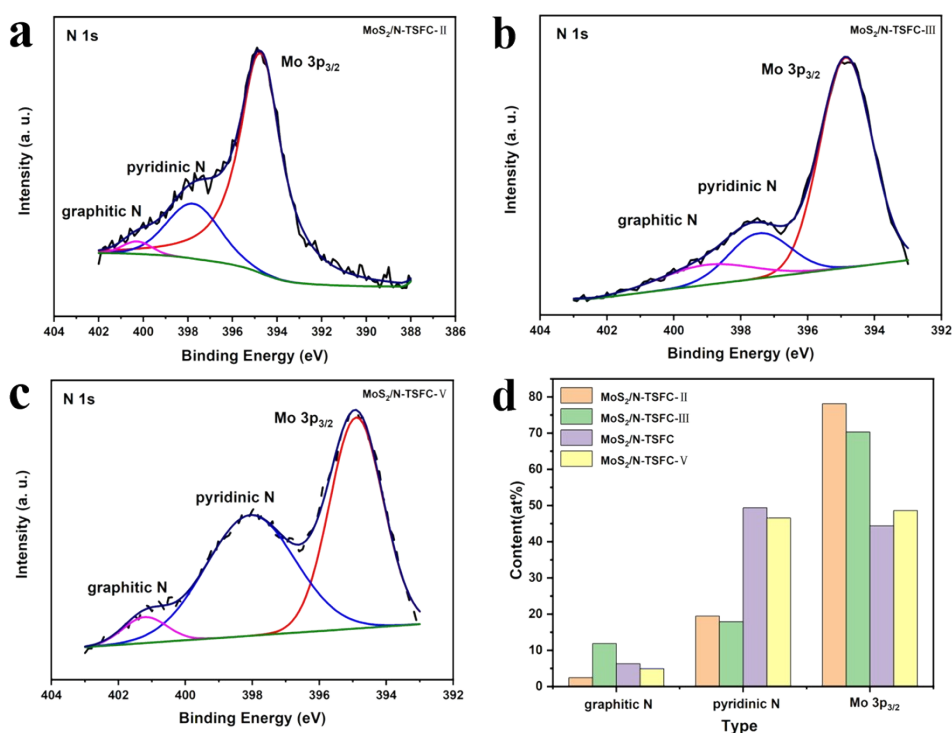

Fig.S4 XPS N1s spectra of (a) MoS<sub>2</sub>/N-TSFC-II, (b) MoS<sub>2</sub>/N-TSFC-III, (c) MoS<sub>2</sub>/N-TSFC-V, (d) different N configurations of samples.

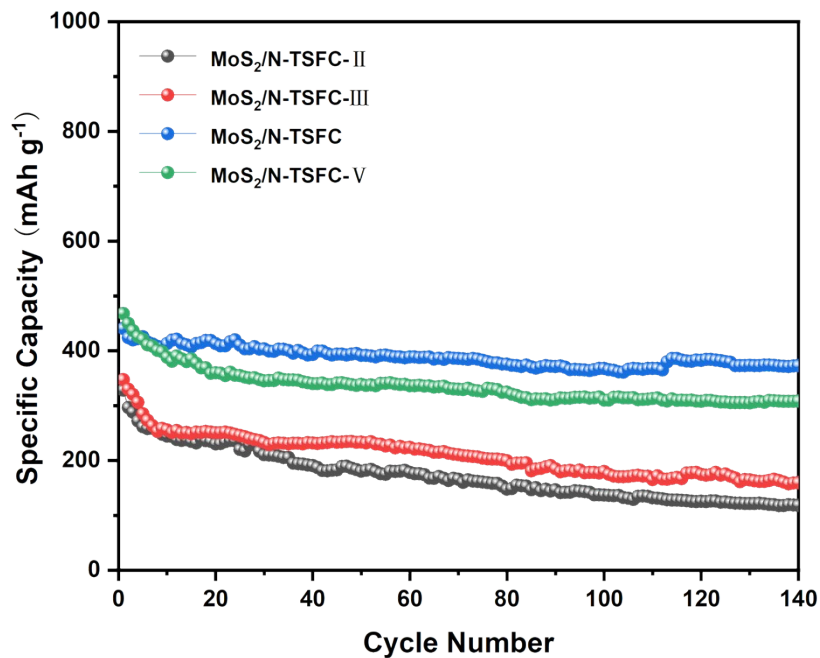

Fig. S5 Cycling performance of different MoS<sub>2</sub>/N-TSFC composites at 0.1 A g<sup>-1</sup>.

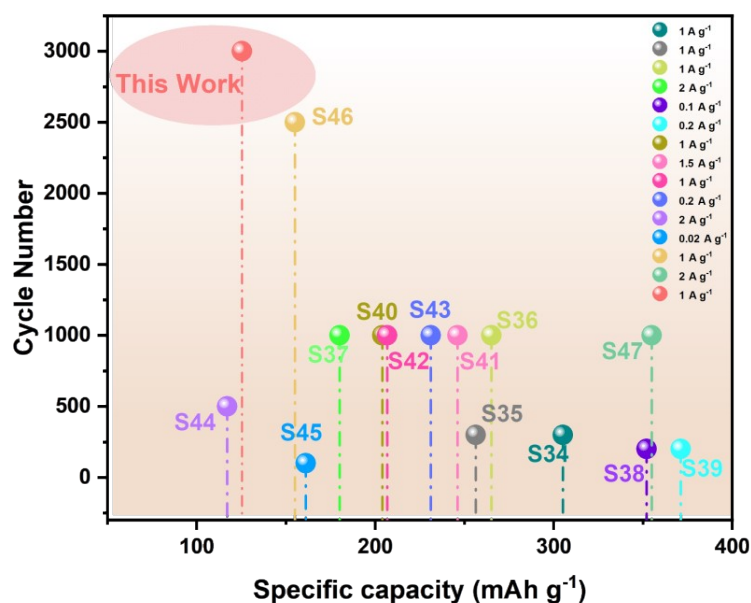

Fig. S6 Comparisons of the electrochemical performance of MoS<sub>2</sub>/N-TSFC with other reported MoS<sub>2</sub>-based anodes for SIBs.

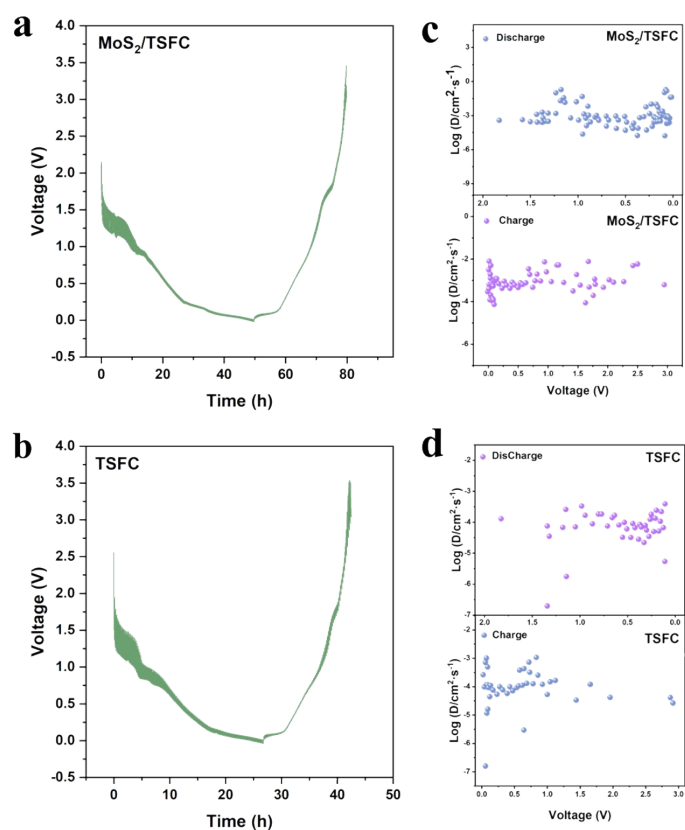

Fig. S7 (a-b) GITT plots, (c-d)  $D_{Na^+}$  values of MoS<sub>2</sub>/TSFC, and TSFC.

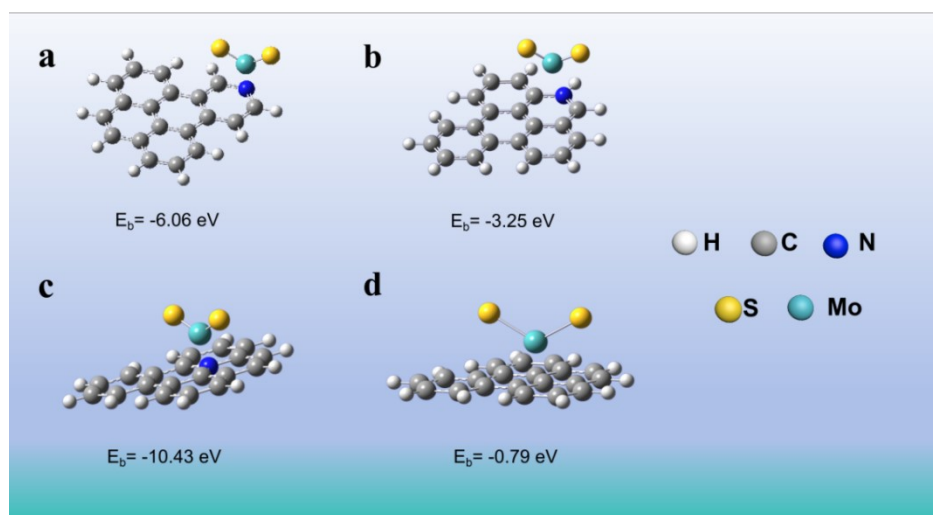

Fig. S8 Atomic models of MoS<sub>2</sub>/TSFC with different N species and binding energies ( $E_b$ ) resulted from DFT calculations, (a) pyridine N+MoS<sub>2</sub>/TSFC compound, (b) pyrrole N+MoS<sub>2</sub>/TSFC compound, (c) graphite N+MoS<sub>2</sub>/TSFC compound, and (d) MoS<sub>2</sub>/TSFC compound.

Table S1 The XRD  $d_{(002)}$  layer spacing parameters for samples.

| Samples         | MoSe <sub>2</sub> /N-TSFC-II | MoSe <sub>2</sub> /N-TSFC-III | MoSe <sub>2</sub> /N-TSFC | MoSe <sub>2</sub> /N-TSFC-V |
|-----------------|------------------------------|-------------------------------|---------------------------|-----------------------------|
| $d_{(002)}$ (Å) | 6.33                         | 6.37                          | 6.58                      | 6.50                        |

Table S2 The atomic content of different N species calculated from N 1s.

| Samples                      | graphite-N (at%) | pyridine-N (at%) | Mo 3p <sub>3/2</sub> (at%) |
|------------------------------|------------------|------------------|----------------------------|
| MoS <sub>2</sub> /N-TSFC-II  | 2.42             | 19.48            | 78.11                      |
| MoS <sub>2</sub> /N-TSFC-III | 11.87            | 17.85            | 70.28                      |
| MoS <sub>2</sub> /N-TSFC     | 6.29             | 49.34            | 44.37                      |
| MoS <sub>2</sub> /N-TSFC-V   | 7.88             | 46.51            | 43.61                      |

Table S3 Comparisons of pyridinic N content (at%) with previously reported work.

| Samples                       | Pyridinic N (%) | ICE (%)   | Reference        |
|-------------------------------|-----------------|-----------|------------------|
| carbon@750 °C                 | 33.08           | 74        | [1]              |
| NPUCS                         | 49              | 75        | [2]              |
| PNHC                          | 40.3            | 56.9      | [3]              |
| p-CNTs@HC-1000                | 41.4            | 98        | [4]              |
| N-MDC                         | 44.54           | 52        | [5]              |
| HNCs                          | 65              | 61        | [6]              |
| NMC2                          | 28.87           | -         | [7]              |
| Co-Ni-S@NSC                   | 48.9            | 76.8      | [8]              |
| NPC-900                       | 28.6            | 74.9      | [9]              |
| CS-1000                       | 65.4            | -         | [10]             |
| <b>MoS<sub>2</sub>/N-TSFC</b> | <b>49.34</b>    | <b>93</b> | <b>This work</b> |

Table S4 Some performance parameters of recently reported materials in SIBs.

| Samples                             | Surface area (m <sup>2</sup> g <sup>-1</sup> ) | ICE (%) | Reference |
|-------------------------------------|------------------------------------------------|---------|-----------|
| HCC                                 | 3.733                                          | 86      | [11]      |
| CNF                                 | 24                                             | 73      | [12]      |
| Wood fiber derived hard carbon      | 126                                            | 72      | [13]      |
| Sucrose derived hard carbon         | 5.4                                            | 83      | [14]      |
| P-doped sucrose derived hard carbon | 7                                              | 73      | [15]      |
| Chitosan derived hard carbon        | 47.6                                           | 85.9    | [16]      |
| SHCs-1500                           | 1.6                                            | 90.5    | [17]      |
| PHC-0.2                             | 44.31                                          | 92.2    | [18]      |

Table S5 Comparisons of the electrochemical performance of MoS<sub>2</sub>/N-TSFC with reported HC-based composite material anodes.

| Material                                                   | Initial reversible capacity                            | ICE          | Reference        |
|------------------------------------------------------------|--------------------------------------------------------|--------------|------------------|
| NPC-CNT@G                                                  | 315 mAh g <sup>-1</sup> at 0.05 A g <sup>-1</sup>      | 43%          | [19]             |
| HCN-800                                                    | 450 mAh g <sup>-1</sup> at 0.1 A g <sup>-1</sup>       | 45%          | [20]             |
| NSC2                                                       | 280 mAh g <sup>-1</sup> at 0.05 A g <sup>-1</sup>      | 35.9%        | [21]             |
| HC@CNF                                                     | 360 mAh g <sup>-1</sup> at 0.025 A g <sup>-1</sup>     | 60%          | [22]             |
| 0.04 M-MnHC                                                | 336.8 mAh g <sup>-1</sup> at 0.02 A g <sup>-1</sup>    | 92.05%       | [23]             |
| N-CNS-1050                                                 | 304.7 mAh g <sup>-1</sup> at 0.05 A g <sup>-1</sup>    | 79.52%       | [24]             |
| e-HC                                                       | 335.6 mAh g <sup>-1</sup> at 0.03 A g <sup>-1</sup>    | 77%          | [25]             |
| Co <sub>2</sub> P@N-C@rGO                                  | 336 mAh g <sup>-1</sup> at 0.05 A g <sup>-1</sup>      | 24.9%        | [26]             |
| HCSs-CNTs                                                  | 214.7 mAh g <sup>-1</sup> at 0.03 A g <sup>-1</sup>    | 33.1%        | [27]             |
| Ni <sub>3</sub> Se <sub>4</sub> @CoSe <sub>2</sub> @C/CNTs | 333 mAh g <sup>-1</sup> at 0.1 A g <sup>-1</sup>       | 54.5%        | [28]             |
| N/S-HC                                                     | 290 mAh g <sup>-1</sup> at 0.03 A g <sup>-1</sup>      | 66%          | [29]             |
| F-MoS <sub>2</sub> @NCN-0.8                                | 407.6 mAh g <sup>-1</sup> at 0.05 A g <sup>-1</sup>    | 70%          | [30]             |
| MoS <sub>2</sub> @NSC                                      | 441 mAh g <sup>-1</sup> at 0.1 A g <sup>-1</sup>       | 74.4%        | [31]             |
| MoO <sub>3</sub> /MoS <sub>2</sub> /NC/MXene               | 434 mAh g <sup>-1</sup> at 0.1 A g <sup>-1</sup>       | 59.6%        | [32]             |
| MoS <sub>2</sub> /NC                                       | 435.97 mAh g <sup>-1</sup> at 0.2 A g <sup>-1</sup>    | 74.75%       | [33]             |
| <b>MoS<sub>2</sub>/N-TSFC</b>                              | <b>589.4mAh g<sup>-1</sup> at 0.02A g<sup>-1</sup></b> | <b>93.0%</b> | <b>This work</b> |

Table S6 Comparisons of the electrochemical performance of MoS<sub>2</sub>/N-TSFC with other reported MoS<sub>2</sub>-based anodes for SIBs.

| Samples                     | Current density(A g <sup>-1</sup> ) | Reversible capacity(mAh g <sup>-1</sup> ) | Cycles | Reference |
|-----------------------------|-------------------------------------|-------------------------------------------|--------|-----------|
| MoS <sub>2</sub> @AMCRs     | 1                                   | 305                                       | 300    | [34]      |
| F-MoS <sub>2</sub> @NCN     | 1                                   | 256.3                                     | 300    | [35]      |
| CC@CN@MoS <sub>2</sub>      | 1                                   | 265                                       | 1000   | [36]      |
| HC@MoS <sub>2</sub> @NC     | 2                                   | 180                                       | 1000   | [37]      |
| MoS <sub>2</sub> @N-C       | 0.1                                 | 352                                       | 200    | [38]      |
| S-BC/E-MoS <sub>2</sub> @NC | 0.2                                 | 371.1                                     | 200    | [39]      |

|                               |          |              |             |                  |
|-------------------------------|----------|--------------|-------------|------------------|
| N-HCS                         | 1        | 204          | 1000        | [40]             |
| N-C@MoS <sub>2</sub>          | 1.5      | 246          | 1000        | [41]             |
| OPBNP                         | 1        | 206.6        | 1000        | [42]             |
| PLHC-N-1000                   | 0.2      | 231          | 1000        | [43]             |
| MoS <sub>2</sub> /FAC         | 2        | 117          | 500         | [44]             |
| MoS <sub>2</sub> nanosheets   | 0.02     | 161          | 100         | [45]             |
| NS-MPC                        | 2        | 155          | 2500        | [46]             |
| MoS <sub>2</sub> @MXene       | 1        | 354.8        | 1000        | [47]             |
| <b>MoS<sub>2</sub>/N-TSFC</b> | <b>1</b> | <b>125.3</b> | <b>3000</b> | <b>This work</b> |

## References

- [1] J. G. Sun, Y. Sun, J. A. Sam Oh, Q. L. Gu, W. D. Zheng, M. H. Goh, K. Y. Zeng, Y. Cheng, L. Lu, *J. Energy Chem*, 2021, **62**, 497-504(s1).
- [2] S.Wu, H. D. Peng, J. L. Xu, L. Huang, Y. S. Liu, X. C. Xu, Y. X. Wu, Z. P. Sun, *Carbon*, 2024, **218**, 118756.
- [3] H. N. He, D. Huang, Y. G. Tang, Q. Wang, X. B. Ji, H. Y. Wang, Z. P. Guo, *Nano Energy*, 2019, **57**, 728-736.
- [4] Y. F. He, D. Liu, J. H. Jiao, Y. X. Liu, S. N. He, Y. Zhang, Q. Cheng, Y. G. Fang, X. L. Mo, H. G. Pan, R. B. Wu, *Adv. Funct. Mater*, 2024, **39**, 2403144.
- [5] R. Muruganatham, Y. X. Chiang, W. R. Liu, *MRS Energy & Sustainability*, 2022, **9**, 313-323.
- [6] S. T. Liu, J. S. Zhou, H. H. Song, *Small*, 2018, **14**, 1703548.



- [7] N. H. Vu, H. T.T. Le, V. H. Hoang, V. D. Dao, H. T. Huu, Y. S. Jun, W. B. Im, J. Alloys Compd, 2021, **851**, 156881.
- [8] Y. N. Wei, W. Bai, S. Yu, Z. R. Wang, J. L. Wang, Appl. Surf. Sci, 2022, **600**, 154155.
- [9] Y. H. Ji, T. Wang, X. Yao, J. K. Gao, Y. T. Chu, J. W. Sun, H. T. Dong, J. Q. Sha, J Energy Storage, 2025, **106**, 114640.
- [10] D. Wang, G. H. Du, D. Han, Q. M. Su, S. K. Ding, M. Zhang, W. Q. Zhao, B. S. Xu, Carbon, 2021, **181**, 1-8.
- [11] P. Liu, Y. Li, Y. S. Hu, H. Li, L. Chen, X. Huang, J. Mater. Chem. A, 2016, **4**, 13046-13052.
- [12] B. Zhang, C. M. Ghimbeu, C. Laberty, C. Vix-Guterl, J. M. Tarascon, Adv. Energy Mater., 2016. **6**, 1501588.
- [13] F. Shen, H. Zhu, W. Luo, J. Wan, L. Zhou, J. Dai, B. Zhao, X. Han, K. Fu, L. Hu, ACS Appl. Mater. Interfaces, 2015, **7**, 23291-23296.
- [14] W. Luo, C. Bommier, Z. Jian, X. Li, R. Carter, S. Vail, Y. Lu, J. J. Lee, X. Ji, ACS Appl. Mater. Interfaces, 2015, **7**, 2626-2631.
- [15] Z. Li, L. Ma, T. Wesley Surta, C. Bommier, Z. Jian, Z. Xing, W. F. Stickle, M. Dolgos, K. Amine, J. Lu, T. Wu, X. Ji, ACS Energy Lett., 2016, **1**, 395-401.
- [16] Y. He, P. Bai, S. Gao, Y. Xu, ACS Appl. Mater. Interfaces, 2018, **10**, 41380-41388.
- [17] B. Yang, J. Wang, Y. Y. Zhu, K. M. Ji, C. Y. Wang, D. B. Ruan, Y. Y. Xia, J. Power Sources, 2021, **492**, 229656.

- [18]Z. G. Liu, J. H. Zhao, H. Yao, X. X. He, H. Zhang, Y. Qiao, X. Q. Wu, L. Li, S. L. Chou, Chem. Sci., 2024, **15**, 8478-8487.
- [19]C. Chen, M. Q. Wu, Z. Q. Xu, T. T. Feng, J. Yang, Z. Chen, S. Z. Wang, Y. S. Wang, J. Colloid Interface Sci, 2019, **538**, 267-276.
- [20]Z. Zhang, Y. Huang, X. Li, S. Zhang, Q. X. Jia, T. H. Li, Chem. Eng. J, 2021, **421**, 129827.
- [21]Q. Z. Jin, K. L. Wang, P. Y. Feng, Z. C. Zhang, S. J. Cheng, K, Energy Storage Mater, 2020, **27**, 43-50.
- [22]U. Ghani, N. Iqbal, A. A. Aboalhassan, C. X. Zhou, B. W. Liu, J. H. Li, Y. Fang, T. Aftab, J. J. Gu, Q. L. Liu. Free-Standing, ACS Appl. Mater. Interfaces, 2022, **14**, 47507-47516.
- [23]J. Zhao, X. X. He, W. H. Lai, Z. Yang, X. H. Liu, L. Li, Y. Qiao, Y. Xiao, L. Li, X. Wu, S. L. Chou, Adv. Energy Mater, 2023, **13**, 2300444.
- [24]Y. H. Zhao, Z. Hu, C. L. Fan, P. Gao, R. S. Zhang, Z. X. Liu, J. S. Liu, J. L. Liu, Small, 2023, **19**, 2303296.
- [25]D. Zhang, Y. Z. Wang, Z. M. Fang, Y. S. He, W. M. Zhang, Z. F. Ma, S. W. Kang, J. Electrochem, 2022, **169**, 050543.
- [26]R. Jin, X. F. Li, Y. X. Sun, H. Shan, L. L. Fan, D. J. Li, X. L. Sun, ACS Appl. Mater, 2018, **10**, 14641-14648.
- [27]L. Y. Suo, J. H. Zhu, X. Y. Shen, Y. Z. Wang, X. Han, Z. Q. Chen, Y. Li, Y. R. Liu, D. Wang, Y. W. Ma, Carbon, 2019, **151**, 1-9.

- [28]H. Y. Zhu, Z. Y. Li, F. Xu, Z. X. Qin, R. Sun, C. H. Wang, S. J. Lu, Y. F. Zhang, H. S. Fan. ACS Appl. Mater, 2022, **611**, 718-725.
- [29]H. H. Zhang, M. Y. Yang, Z. C. Xiao, K. Y. Xie, L. Shao, C. Huang, C. Y. Shu, C. X. Peng, Y. P. Wu, W. Tang, Energy Fuels, 2023, **37**, 15127-15137.
- [30]J. F. Li, W. X. Gao, L. Y. Huang, Y. C. Jiang, X. T. Chang, S. B. Sun, L. K. Pan, Appl. Surf. Sci. 2022, **571**, 15130.
- [31]G. S. Dong, L. X. Li, K. Zhu, J. Yan, G. L. Wang, D. X. Cao, Small, 2023, **29**, 2208291.
- [32]Z. Q. Yu, Q. Wang, K. Zhu, G. L. Wang, D. X. Cao, J. Yan, Appl. Surf. Sci, 2024, **652**, 159294.
- [33]F. X. Du, S. L. Liu, Y. Li, J. K. Wang, P. Zhang, Ionics, 2023, **29**, 5183-5193.
- [34]Y. C. Pang, S. Y. Zhang, L. M. Liu, J. Liang, Z. J. Sun, Y. K. Wang, C. H. Xiao, D. W. Ding, S. J. Ding , J. Mater. Chem. A, 2017, **5**, 17963-17972.
- [35]J. F. Li, W. X. Gao, L. Y. Huang, Y. C. Jiang, X. T. Chang, S. B. Sun, L. K. Pan, Appl. Surf. Sci, 2022, **571**, 151307.
- [36]W. N. Ren, H. F. Zhang, C. Guan, C. W. Cheng, Advanced Functional Materials, 2017, **27**, 1702116.
- [37]G. Q. Suo, B. G. Zhao, R. R. Mu, C. J. Lin, S. Z. Javed, X. J. Hou, X. H. Ye, Y. L. Yang, L. Zhang, J Energy Storage, 2024, **77**, 109801.
- [38]Z. R. Yao, K. J. Zhu, X. Li, J. Wang, K. Yan, J. S. Liu, J. Alloys Compd, 2020, **838**, 155541.

- [39]H. Huang, L. J. Zhao, Z. Q. Zheng, D. Xie, P. Liu, Y. J. Mai, F. L. Cheng, *Electrochim. Acta*, 2023, **461**, 142626.
- [40]R. R. Gaddam, A. H. F. Niaei, M. Hankel , D. J. Searles, N. A. Kumar, X. S. Zhao, *J. Mater. Chem. A*, 2017, **5**, 22186-2219.
- [41]H. Y. Li, G. Yu, J. Luo, G. Y. Li, W. Wang, B. H. He, Z. H. Hou, H. Yin, J. *Electroanal. Chem*, 2022, **922**, 116715.
- [42]Y. J. Li, X. F. Zou, S. Q. Li, Y. Y. Chen, G. X. Wang, H. X. Yang, H. Tian, J. *Mater. Chem. A*, 2024, **12**, 18324-18337.
- [43]W. Nie, H. W. Cheng, X. L. Liu, Q. C. Sun, F. Tian, W. L. Yao, S. Q. Liang, X. G. Lu, J. Zhou, *J. Power Sources*, 2022, **522**, 230994.
- [44]Y. Ren, Z. Xu, Y. Wang, F. Lu, Y. Zhao, K. Yao, H. Fu, H. Luo, *Mater Sci Eng B*, 2023, **296**, 116684.
- [45]G. S. Bang, K. W. Nam, J. Y. Kim, J. Shin, J. W. Choi, S. Y. Choi, *ACS Appl Mater Interfaces*, 2014, **6**, 7084-7089.
- [46]R. Muruganatham, F. M. Wang, W. R. Liu, *Electrochim. Acta*, 2022, **424**, 140573.
- [47]C. T. Chen, J. L. Chen, W. Yang, H. B. Zou, S. Z. Chen, *J Energy Storage*, 2024, **100**, 113630.
